# Supplementary material for: Terpyridine-functionalized chemically cross-linked polyacrylamide hydrogel for white emission and multistimuli-responsive behaviour
Source: Royal Society of Chemistry journal article supplement (doi:10.1039/d0nj01269f), 2020-01-01
Supplement: d0nj01269f1.pdf [file d0nj01269f1.pdf]

### Supporting Information

#### Terpyridine-functionalized chemically cross-linked polyacrylamide hydrogel for white emission and multistimuli-responsive behaviour

Kaiqi Fan <sup>a</sup>, Xiaobo Wang <sup>b</sup>, Yongpeng Ma <sup>a</sup>, Haoran Yang <sup>a</sup>, Guanglu Han <sup>a</sup>, Liming Zhou\*<sup>a</sup>,  
Shaoming Fang\*<sup>a</sup>

#### Table of contents:

|                  |          |
|------------------|----------|
| <b>Figure S1</b> | <b>2</b> |
| <b>Figure S2</b> | <b>2</b> |
| <b>Figure S3</b> | <b>3</b> |
| <b>Figure S4</b> | <b>3</b> |
| <b>Table S1</b>  | <b>4</b> |
| <b>Figure S5</b> | <b>4</b> |
| <b>Figure S6</b> | <b>4</b> |

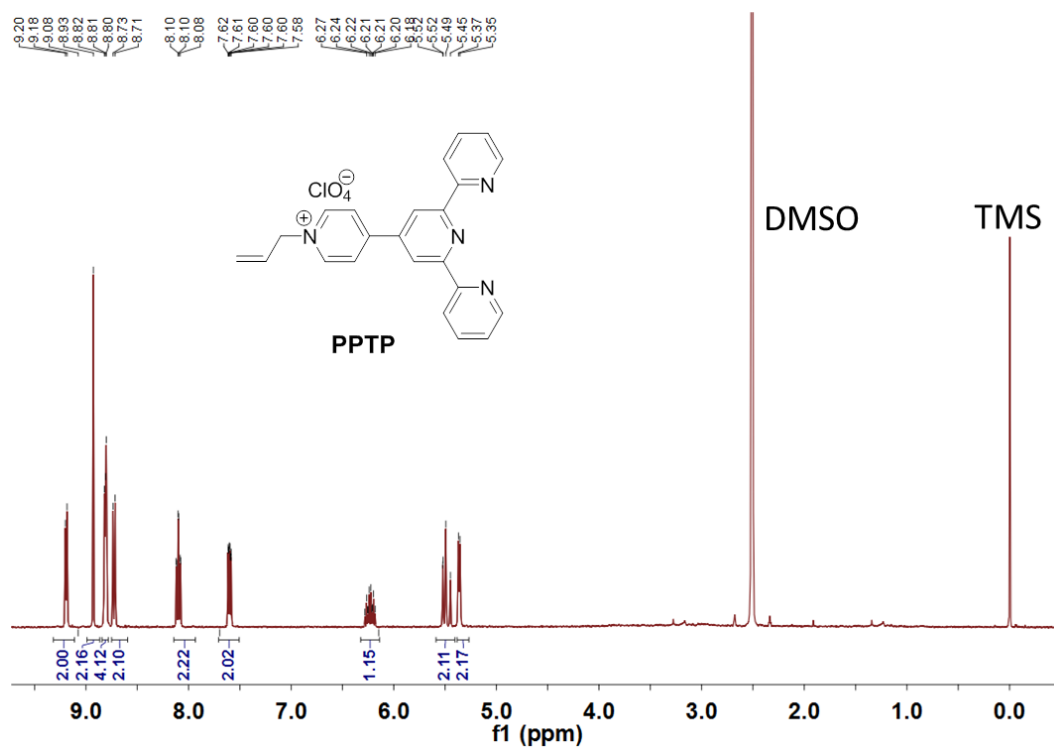

Fig. S1  $^1\text{H}$  NMR spectrum (400 MHz, DMSO- $d_6$ , 298 K) of compound PPTP.

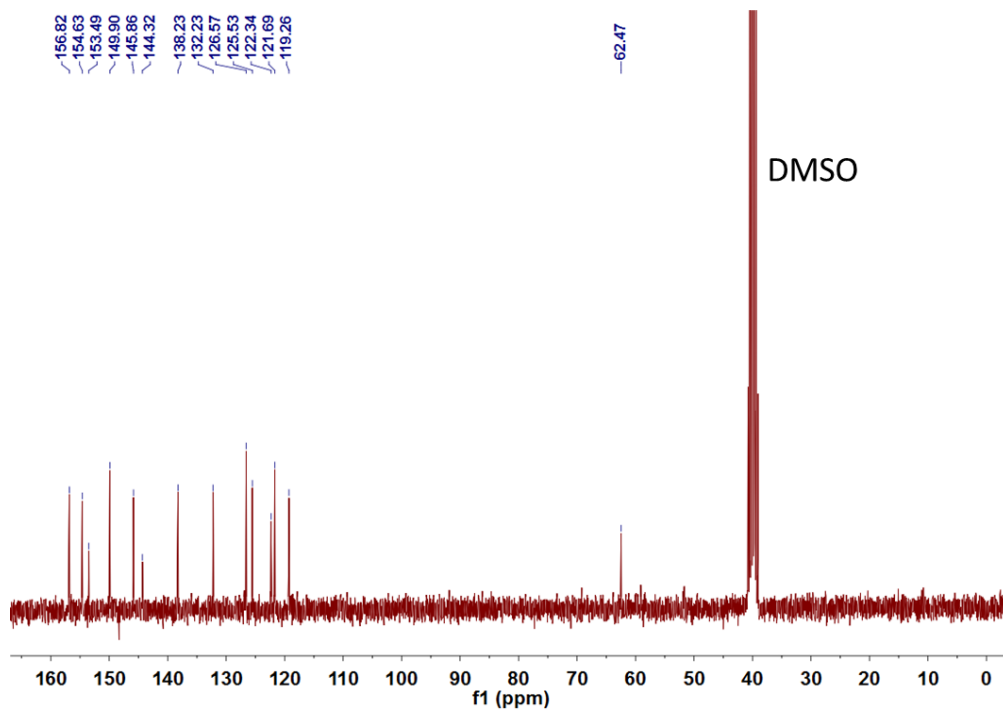

Fig. S2  $^{13}\text{C}$  NMR spectrum (400 MHz, DMSO- $d_6$ , 298 K) of compound PPTP.

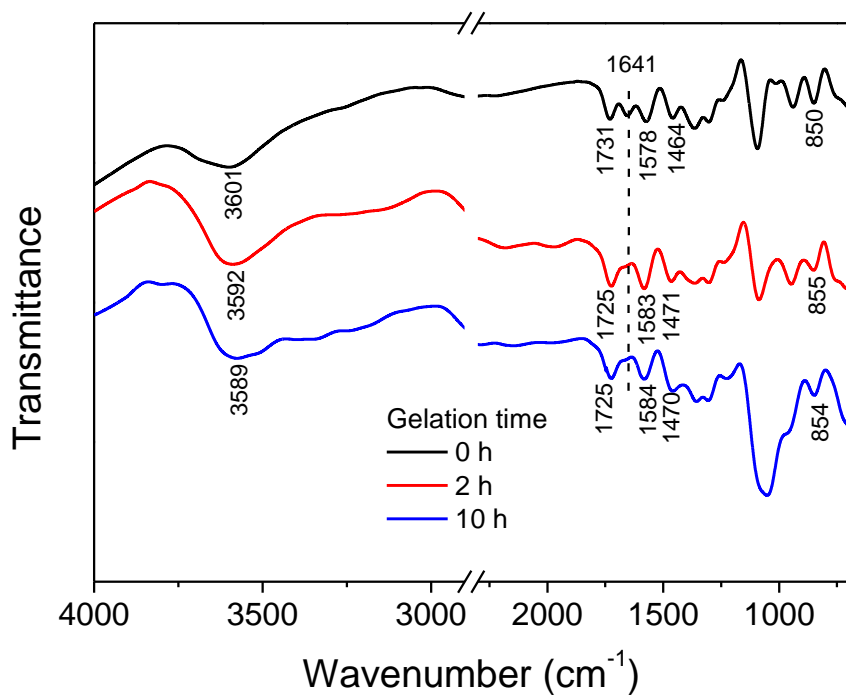

**Fig. S3** Fourier transform infrared (FTIR) spectra of the precursor solution and hydrogel after polymerization at 60 °C for 2 h and 12 h.

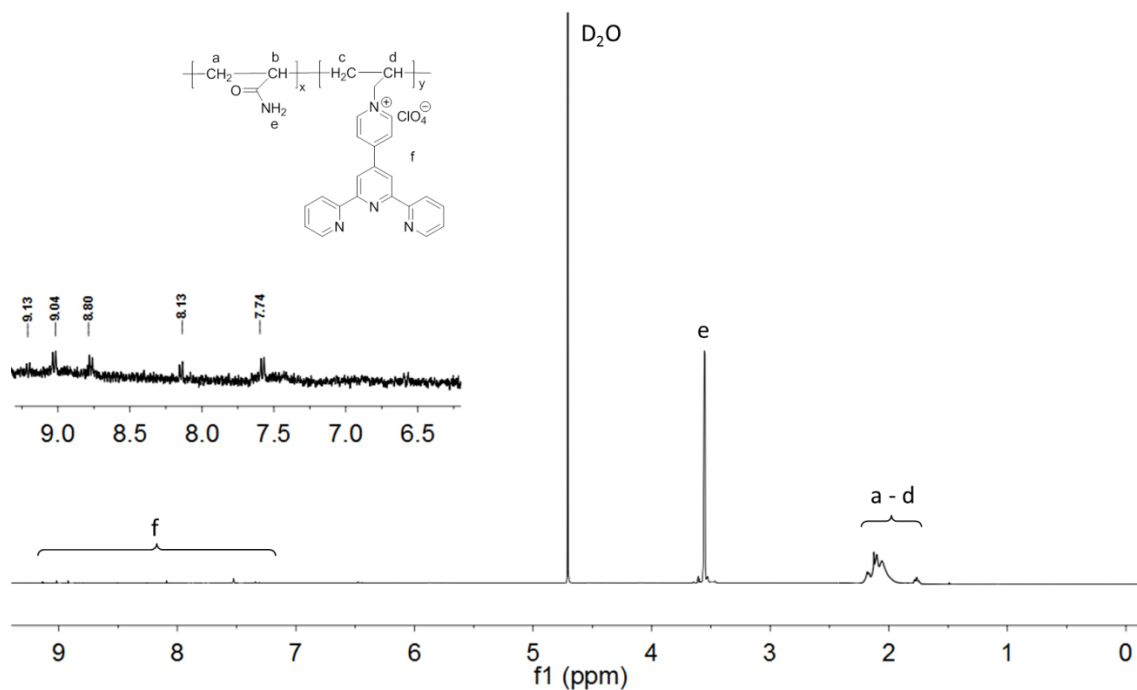

**Fig. S4** <sup>1</sup>H NMR spectra (400 MHz, D<sub>2</sub>O, 298 K) of the polyacrylamide-co-poly (PPTP)

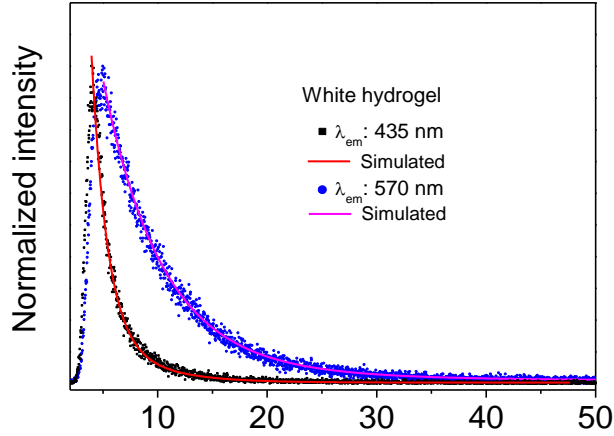

**Fig. S5** Fluorescence decay curves of the white fluorescent hydrogel. The monitoring wavelengths are shown in the figures. All the fluorescence decays can be fitted by single-exponential curve, as shown in the figure.

**Table S1.** Photophysical parameters of the white hydrogel

| $\lambda_1^a$ (nm) | $\lambda_2^a$ (nm) | $\tau_1^b$ (ns) | $\tau_2^b$ (ns) | $\Phi^c$ (%) |
|--------------------|--------------------|-----------------|-----------------|--------------|
| 435                | 570                | 2.6             | 6.7             | 4.2          |

<sup>a</sup> Wavelength number of high- and low-energy emission peaks.

<sup>b</sup> Fluorescent lifetime of high- and low-energy emission peaks.

<sup>c</sup> Quantum yield.

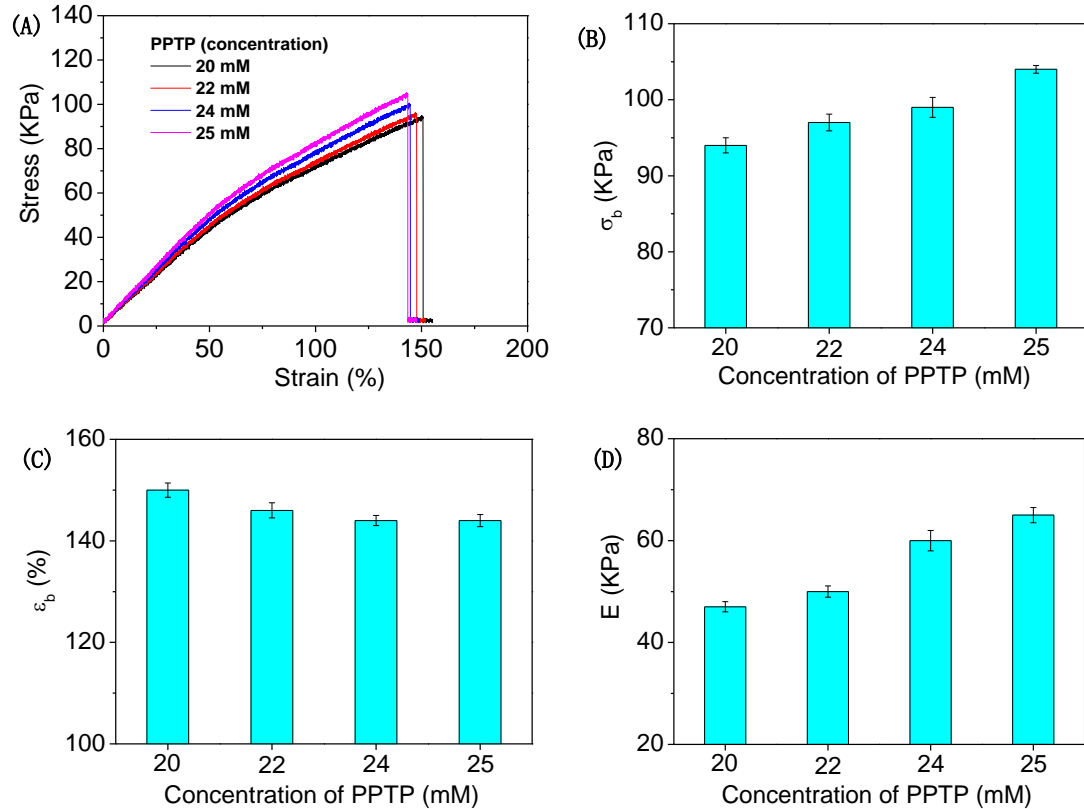

**Fig. S6** (A) Tensile stress–strain curves, (B) tensile breaking stress  $\sigma_b$ , (C) breaking strain  $\epsilon_b$ , and (D) Young's modulus E of the white fluorescent hydrogel at different concentration of PPTP.
